# Supplementary material for: Stereomask lithography (SML): a universal multi-object micro-patterning technique for biological applications
Source: Royal Society of Chemistry journal article supplement (doi:10.1039/c0lc00275e), 2010-11-26

**Electronic Supplementary Information For**  
**Stereomask Lithography (SML): Universal Multi-Object Micro-Patterning Technique for Biological Applications**

Siwei Zhao, Arnold Chen, Alexander Revzin and Tingrui Pan

Department of Biomedical Engineering, University of California, Davis, CA 95616

Email: [tingrui@ucdavis.edu](mailto:tingrui@ucdavis.edu)

**A testing alignment structure comprising micro pillars of 250 $\mu$ m in diameter on substrate plugging into a stereomask with micro holes of 300 $\mu$ m in diameter. The vernier structures indicate the misalignment in both horizontal and vertical directions is within 10 $\mu$ m. The scale bar shows 300 $\mu$ m.**

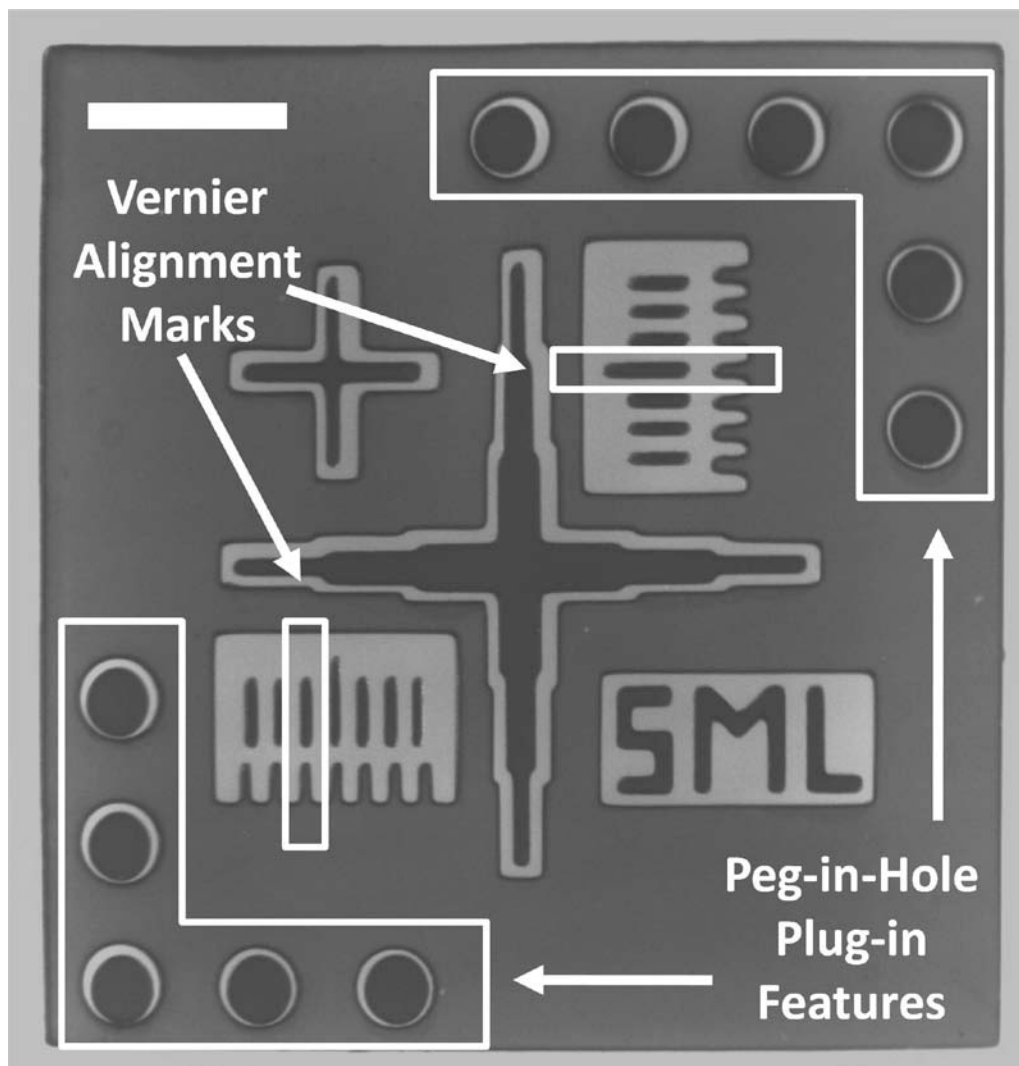

Supplement: c0lc00275e.pdf [file c0lc00275e.pdf]
